# Supplementary material for: Well-controlled synthesis of biodegradable polyesters using edible catalysts
Source: Royal Society of Chemistry journal article supplement (doi:10.1039/d5gc05933j), 2026-01-01
Supplement: d5gc05933j1.pdf [file d5gc05933j1.pdf]

## Supplementary Information

# Well-Controlled Synthesis of Biodegradable Polyesters using Edible Catalysts

Toshiki Miwa,<sup>a</sup> Ryota Suzuki,<sup>b</sup> Tianle Gao,<sup>b</sup> Takuya Yamamoto,<sup>b</sup> Feng Li,<sup>\*b</sup>

Takuya Isono,<sup>b</sup> Toshifumi Satoh<sup>\*b,c,d</sup>

<sup>a</sup> Graduate School of Chemical Sciences and Engineering, Hokkaido University, Sapporo  
060-8628, Japan

<sup>b</sup> Division of Applied Chemistry, Faculty of Engineering, Hokkaido University, Sapporo  
060-8628, Japan

<sup>c</sup> List Sustainable Digital Transformation Catalyst Collaboration Research Platform (List-PF), Institute for Chemical Reaction Design and Discovery (ICReDD), Hokkaido University, Sapporo 001-0021, Japan

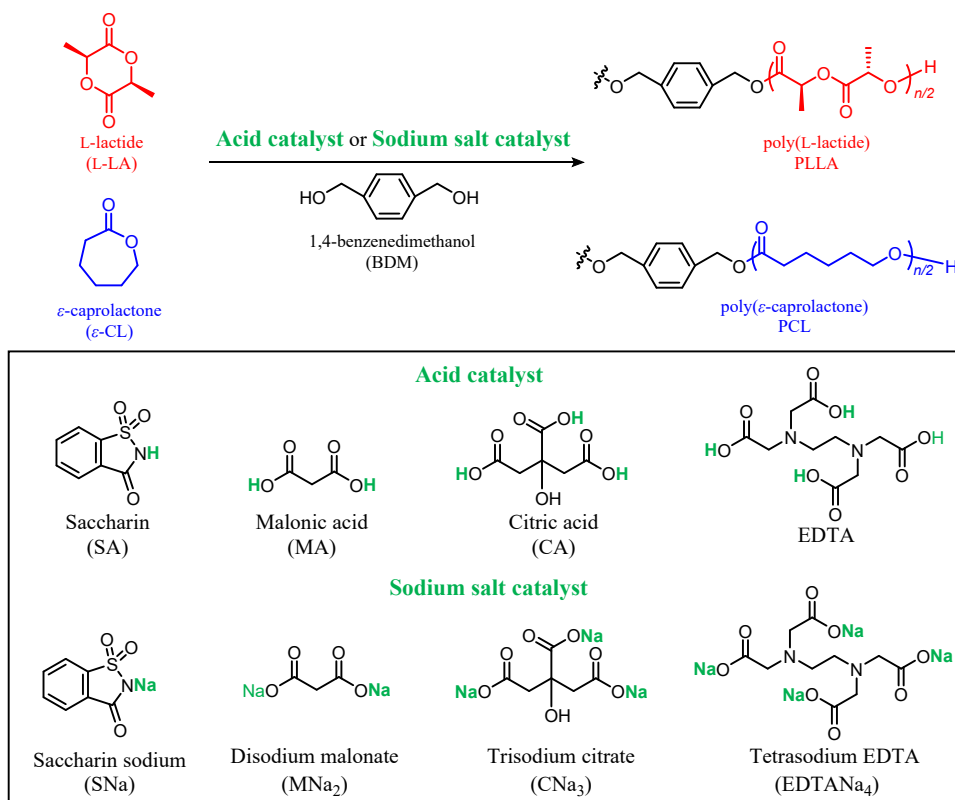

**Table S1** Ring-opening polymerization of L-LA and  $\epsilon$ -CL using various catalysts <sup>a</sup>

| run | monomer        | catalyst            | conv. (%) <sup>b</sup> | $M_{n,th.}$<br>(g mol <sup>-1</sup> ) <sup>b</sup> | $M_{n,NMR}$<br>(g mol <sup>-1</sup> ) <sup>c</sup> | $M_{n,SEC}$<br>(g mol <sup>-1</sup> ) <sup>d</sup> | $\bar{D}$ <sup>d</sup> |
|-----|----------------|---------------------|------------------------|----------------------------------------------------|----------------------------------------------------|----------------------------------------------------|------------------------|
| 1   | L-LA           | SA                  | 4.8                    | 830                                                | n.d. <sup>e</sup>                                  | n.d. <sup>e</sup>                                  | n.d. <sup>e</sup>      |
| 2   |                | MA                  | 8.9                    | 1420                                               | n.d. <sup>e</sup>                                  | n.d. <sup>e</sup>                                  | n.d. <sup>e</sup>      |
| 3   |                | CA                  | 9.2                    | 1460                                               | n.d. <sup>e</sup>                                  | n.d. <sup>e</sup>                                  | n.d. <sup>e</sup>      |
| 4   |                | EDTA                | 7.2                    | 1180                                               | n.d. <sup>e</sup>                                  | n.d. <sup>e</sup>                                  | n.d. <sup>e</sup>      |
| 5   |                | SNa                 | 34.1                   | 5050                                               | n.d. <sup>e</sup>                                  | 3900                                               | 1.12                   |
| 6   |                | MNa <sub>2</sub>    | 88.2                   | 12,900                                             | 7060                                               | 7800                                               | 1.15                   |
| 7   |                | CNa <sub>3</sub>    | 64.9                   | 9490                                               | 6620                                               | 5800                                               | 1.14                   |
| 8   |                | EDTANa <sub>4</sub> | 96.2                   | 14,000                                             | 16,400                                             | 8900                                               | 1.21                   |
| 9   | $\epsilon$ -CL | SA                  | 82.3                   | 9530                                               | 8930                                               | 15,200                                             | 1.13                   |
| 10  |                | MA                  | 25.6                   | 3060                                               | n.d. <sup>e</sup>                                  | 4400                                               | 1.16                   |
| 11  |                | CA                  | 97.9                   | 11,300                                             | 13,300                                             | 9500                                               | 1.81                   |
| 12  |                | EDTA                | <3.0                   | n.d. <sup>e</sup>                                  | n.d. <sup>e</sup>                                  | n.d. <sup>e</sup>                                  | n.d. <sup>e</sup>      |
| 13  |                | SNa                 | <3.0                   | n.d. <sup>e</sup>                                  | n.d. <sup>e</sup>                                  | n.d. <sup>e</sup>                                  | n.d. <sup>e</sup>      |
| 14  |                | MNa <sub>2</sub>    | <3.0                   | n.d. <sup>e</sup>                                  | n.d. <sup>e</sup>                                  | n.d. <sup>e</sup>                                  | n.d. <sup>e</sup>      |
| 15  |                | CNa <sub>3</sub>    | <3.0                   | n.d. <sup>e</sup>                                  | n.d. <sup>e</sup>                                  | n.d. <sup>e</sup>                                  | n.d. <sup>e</sup>      |
| 16  |                | EDTANa <sub>4</sub> | <3.0                   | n.d. <sup>e</sup>                                  | n.d. <sup>e</sup>                                  | n.d. <sup>e</sup>                                  | n.d. <sup>e</sup>      |

<sup>a</sup> Polymerization conditions: atmosphere, Ar; initiator, BDM; [monomer]<sub>0</sub>/[BDM]<sub>0</sub>/[catalyst] = 100/1/5; temperature, 100 °C; reaction time, 24 h. <sup>b</sup> Determined by <sup>1</sup>H NMR spectrum of the obtained polymer in CDCl<sub>3</sub>.

<sup>c</sup> Calculated from [monomer]<sub>0</sub>/[BDM]<sub>0</sub> × conv. × (M.W. of monomer) + (M.W. of BDM). <sup>d</sup> Determined by SEC in THF using polystyrene standard. <sup>e</sup> Not determined.

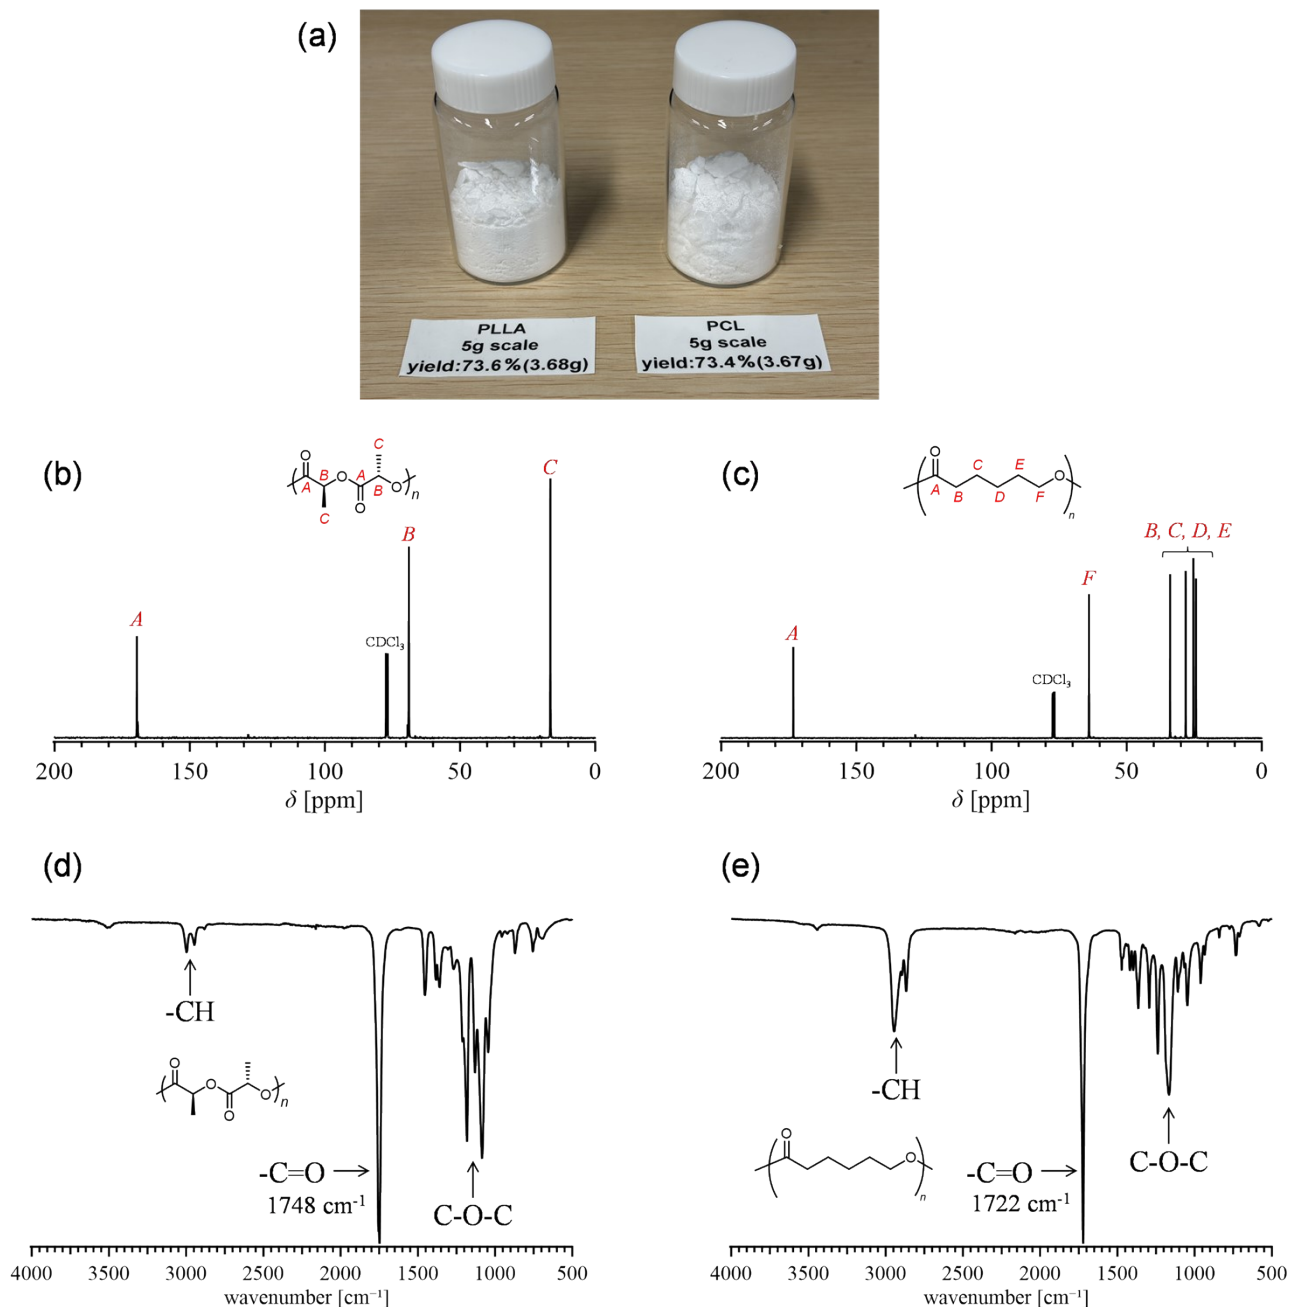

**Fig. S1.** (a) Photographs of PLLA and PCL synthesized on a larger scale. (runs 5 and 8 in **Table 1**). (b)  $^{13}\text{C}$  NMR spectrum of the PLLA obtained from run 5 in **Table 1** (solvent,  $\text{CDCl}_3$ ; 100 MHz). (c)  $^{13}\text{C}$  NMR spectrum of the PCL obtained from run 8 in **Table 1** (solvent,  $\text{CDCl}_3$ ; 100 MHz). (d) FT-IR spectrum of the PLLA obtained from run 5 in **Table 1**. (e) FT-IR spectrum of the PCL obtained from run 8 in **Table 3**.

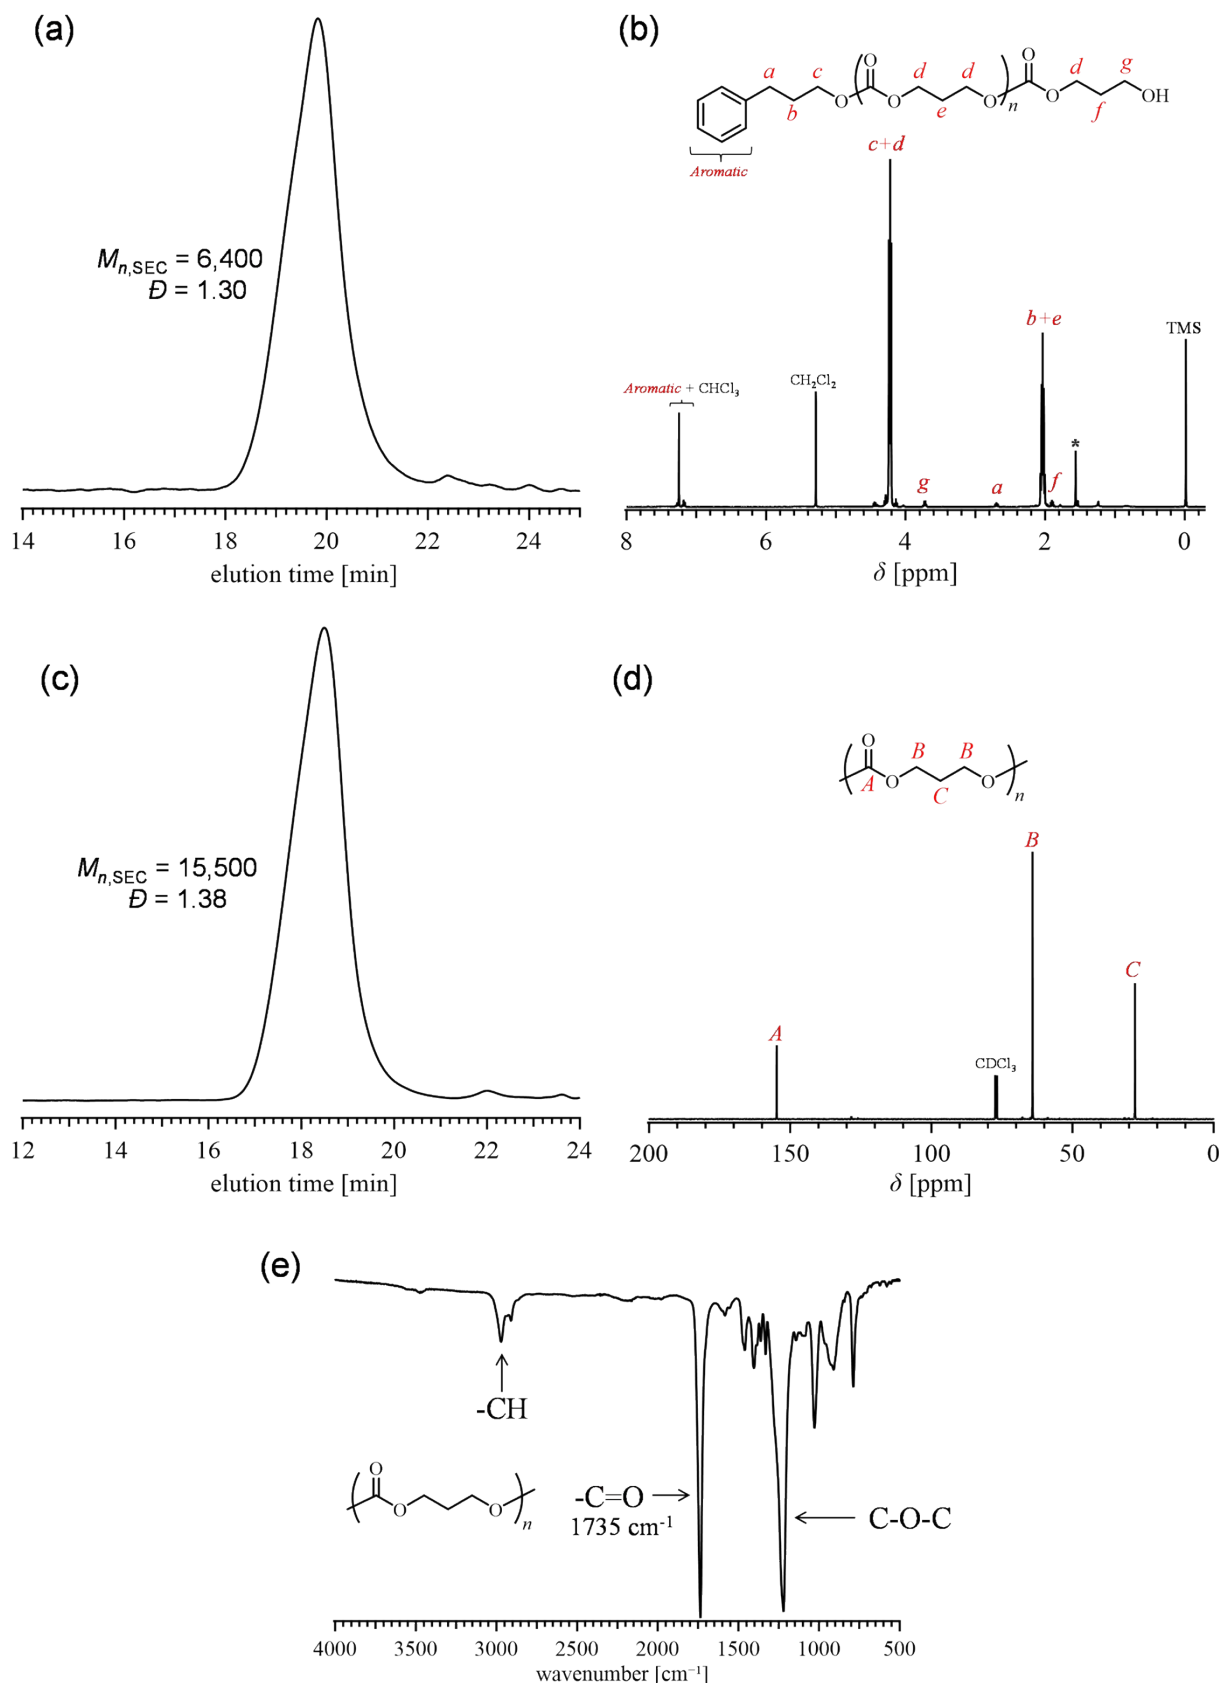

**Fig. S2** (a) SEC trace of the PTMC obtained from run 2 in **Table 2** (eluent, THF; flow rate, 1.0 mL min<sup>-1</sup>). (b) <sup>1</sup>H NMR spectrum of the PTMC obtained from run 2 in **Table 2** (solvent, CDCl<sub>3</sub>; 400 MHz). (c) SEC trace of the PTMC obtained from run 3 in **Table 2** (eluent, THF; flow rate, 1.0 mL min<sup>-1</sup>). (d) <sup>13</sup>C NMR spectrum of the PTMC obtained from run 3 in **Table 2** (solvent, CDCl<sub>3</sub>; 100 MHz). (e) FT-IR spectrum of the PTMC obtained from run 3 in **Table 2**.

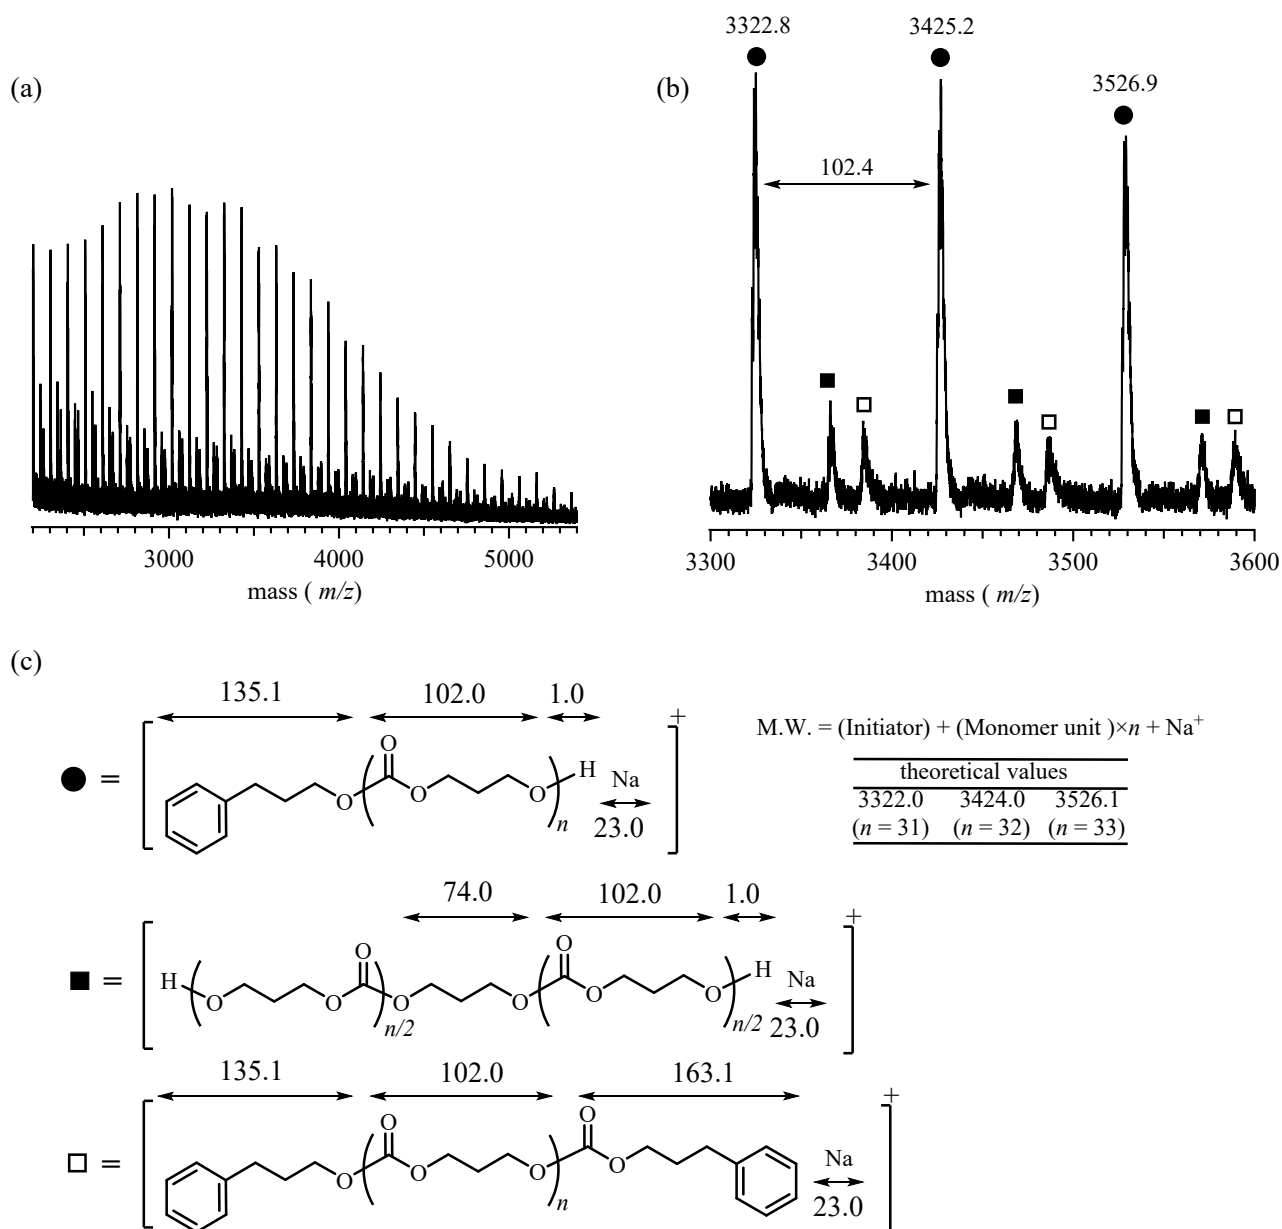

**Fig. S3** (a) MALDI-TOF mass spectrum of PTMC (run 2 in Table 2), (b) expanded spectrum (ranging from 3300 to 3600), and (c) theoretical values.

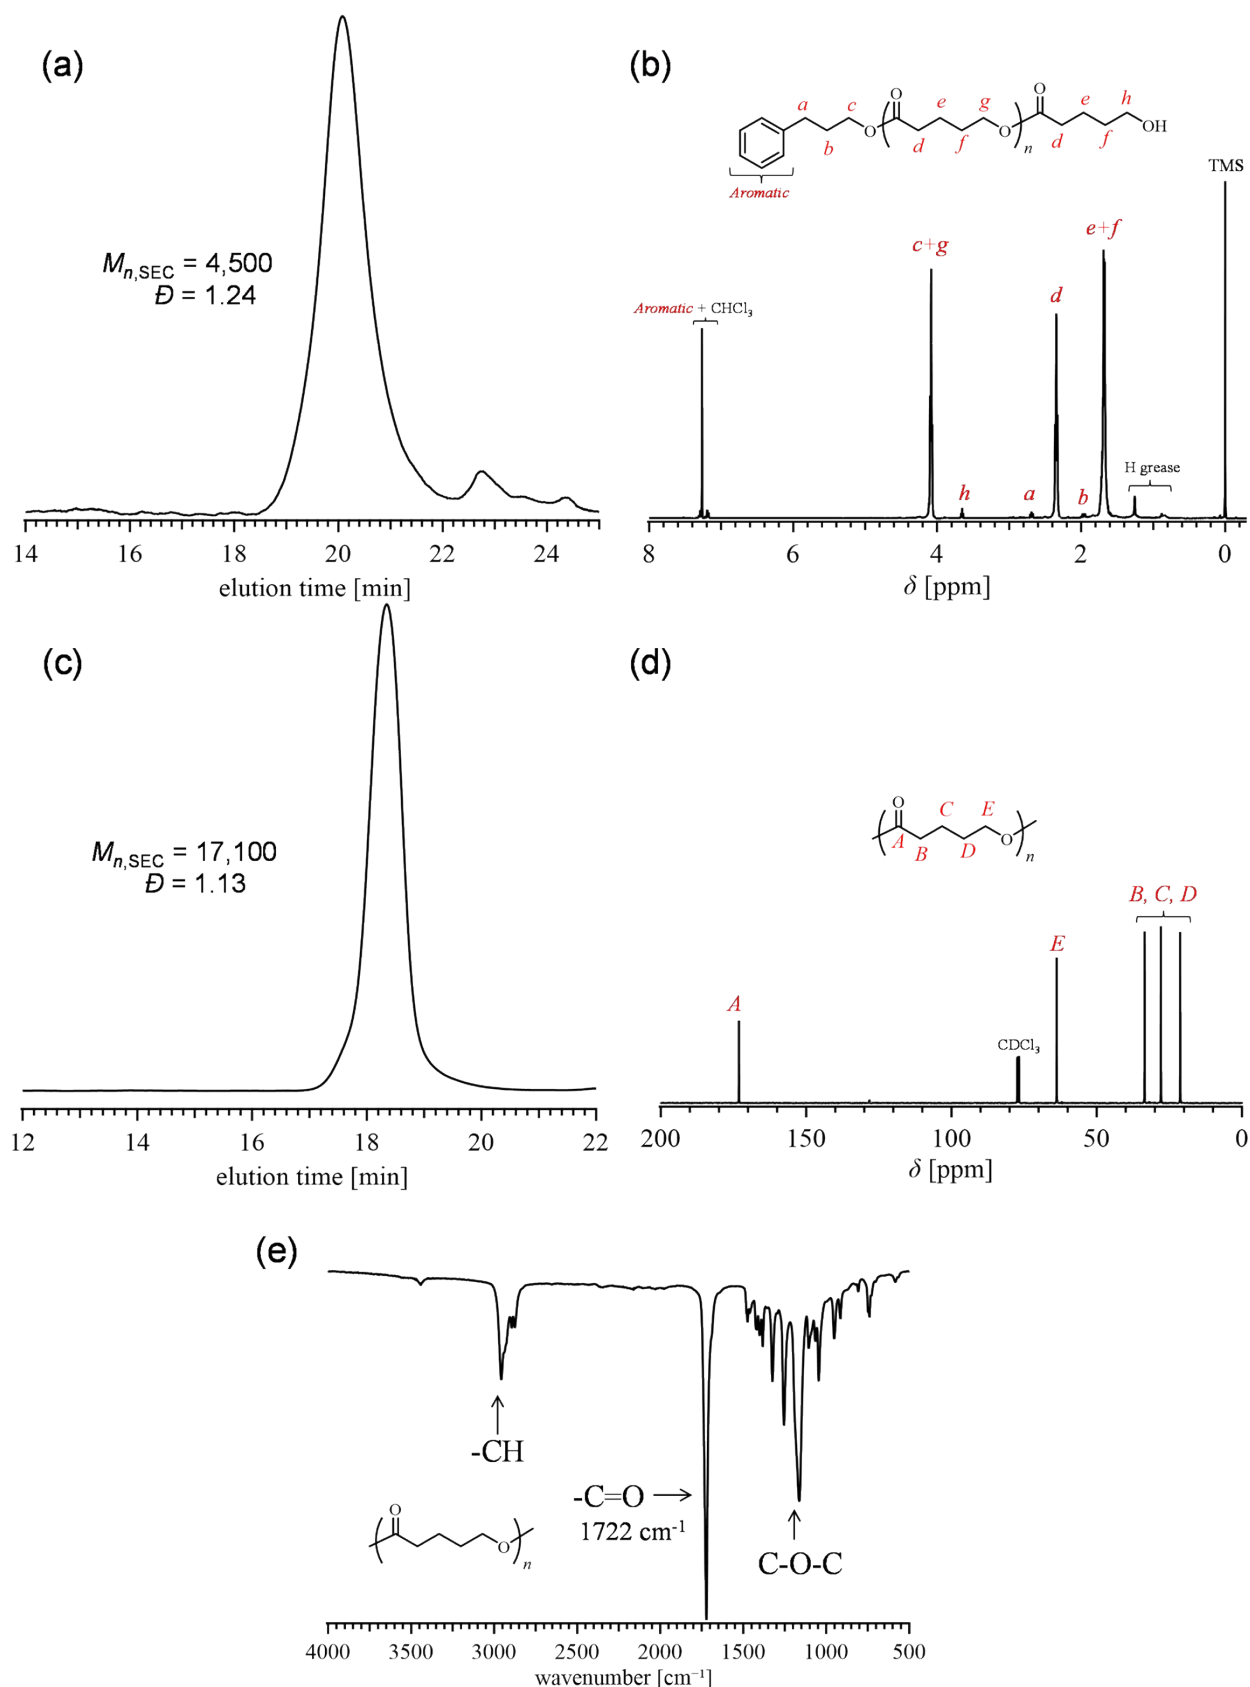

**Fig. S4** (a) SEC trace of the PVL obtained from run 4 in **Table 2** (eluent, THF; flow rate,  $1.0 \text{ mL min}^{-1}$ ). (b)  $^1\text{H}$  NMR spectrum of the PVL obtained from run 4 in **Table 2** (solvent,  $\text{CDCl}_3$ ; 400 MHz). (c) SEC trace of the PVL obtained from run 6 in **Table 2** (eluent, THF; flow rate,  $1.0 \text{ mL min}^{-1}$ ). (d)  $^{13}\text{C}$  NMR spectrum of the PVL obtained from run 6 in **Table 2** (solvent,  $\text{CDCl}_3$ ; 100 MHz). (e) FT-IR spectrum of the PVL obtained from run 6 in **Table 2**

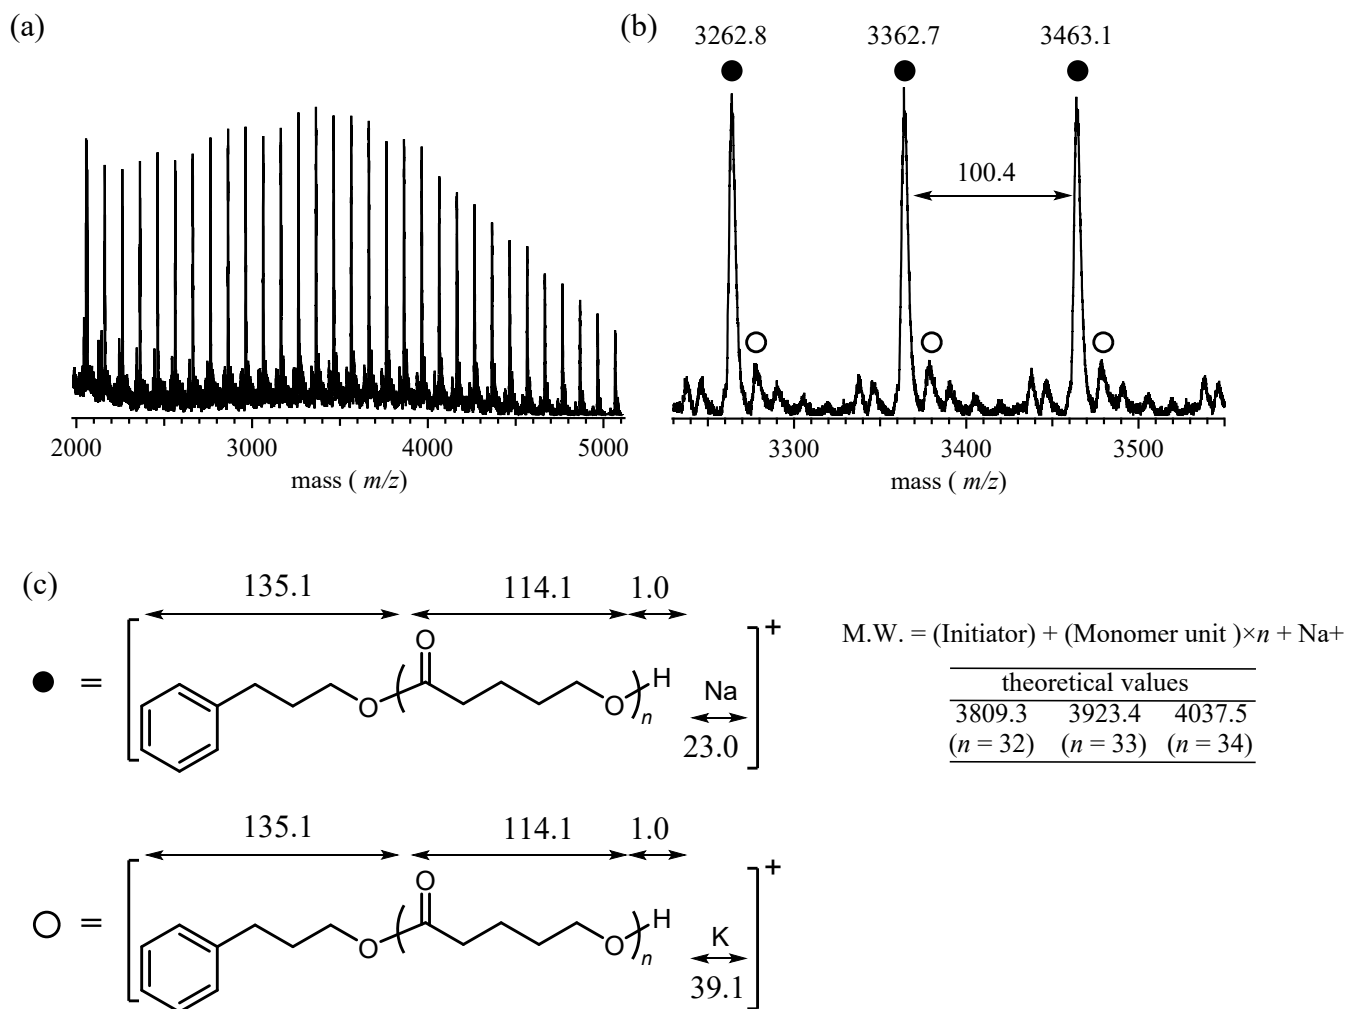

**Fig. S5** (a) MALDI-TOF mass spectrum of PVL (run 4 in Table 2), (b) expanded spectrum (ranging from 3230 to 3550), and (c) theoretical values.

**Scheme S1** Ring-opening polymerization of L-LA and  $\epsilon$ -CL catalyzed by various citrates

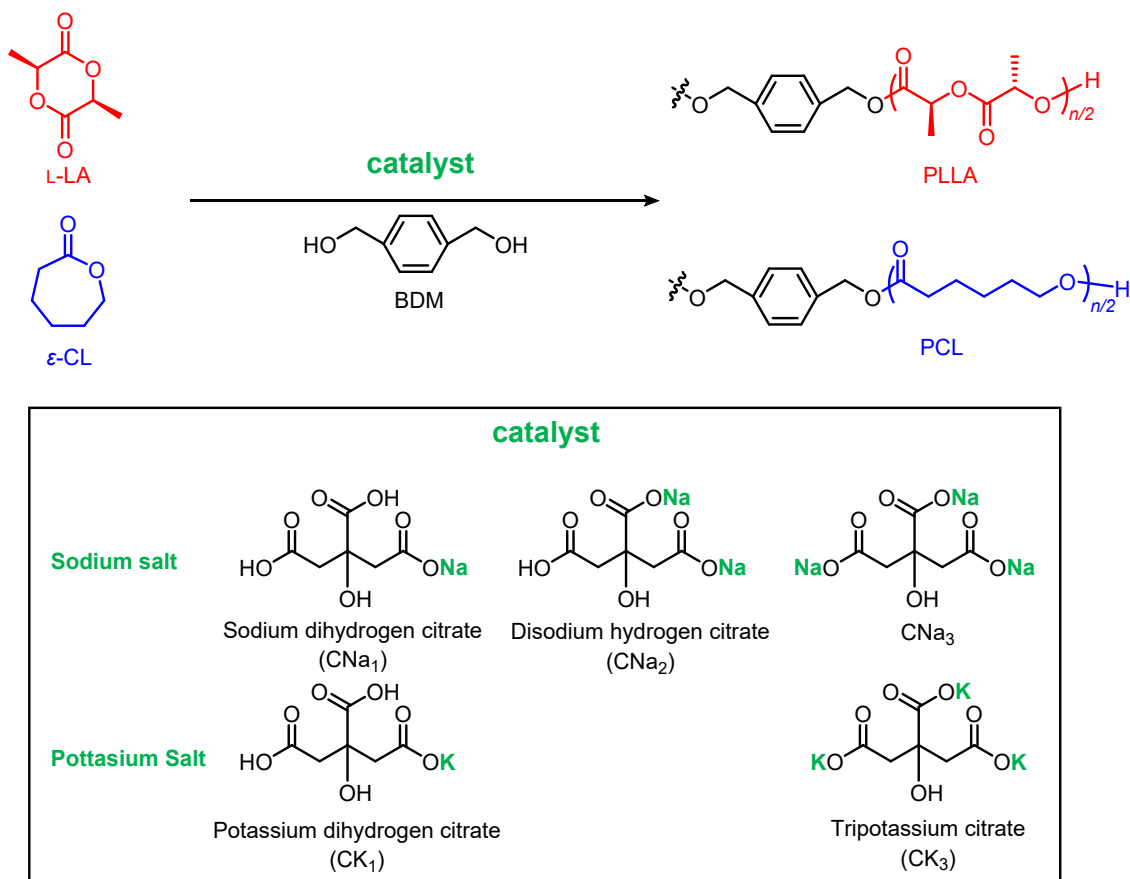

**Table S2** Ring-opening polymerization of L-LA and  $\epsilon$ -CL catalyzed by various citrates <sup>a</sup>

| run | monomer        | Catalyst       | conv. (%) <sup>b</sup> | $M_{n,\text{th.}}$<br>(g mol <sup>-1</sup> ) <sup>c</sup> | $M_{n,\text{NMR}}$<br>(g mol <sup>-1</sup> ) <sup>b</sup> | $M_{n,\text{SEC}}$<br>(g mol <sup>-1</sup> ) <sup>d</sup> | $\bar{D}$ <sup>d</sup> |
|-----|----------------|----------------|------------------------|-----------------------------------------------------------|-----------------------------------------------------------|-----------------------------------------------------------|------------------------|
| 1   | L-LA           | CA             | 9.2                    | 1460                                                      | n.d. <sup>e</sup>                                         | n.d. <sup>e</sup>                                         | n.d. <sup>e</sup>      |
| 2   |                | $\text{CNa}_1$ | 9.6                    | 1520                                                      | n.d. <sup>e</sup>                                         | n.d. <sup>e</sup>                                         | n.d. <sup>e</sup>      |
| 3   |                | $\text{CNa}_2$ | 17.1                   | 2600                                                      | n.d. <sup>e</sup>                                         | n.d. <sup>e</sup>                                         | n.d. <sup>e</sup>      |
| 4   |                | $\text{CNa}_3$ | 64.9                   | 9490                                                      | 6620                                                      | 5800                                                      | 1.14                   |
| 5   |                | $\text{CK}_1$  | 21.1                   | 3180                                                      | n.d. <sup>e</sup>                                         | n.d. <sup>e</sup>                                         | n.d. <sup>e</sup>      |
| 6   |                | $\text{CK}_3$  | 97.8                   | 14,200                                                    | 7780                                                      | 10,500                                                    | 1.09                   |
| 7   | $\epsilon$ -CL | CA             | 97.9                   | 11,300                                                    | 11,900                                                    | 9500                                                      | 1.81                   |
| 8   |                | $\text{CNa}_1$ | 96.9                   | 11,200                                                    | 11,900                                                    | 8300                                                      | 1.44                   |
| 9   |                | $\text{CNa}_2$ | 15.4                   | 1900                                                      | n.d. <sup>e</sup>                                         | n.d. <sup>e</sup>                                         | n.d. <sup>e</sup>      |
| 10  |                | $\text{CNa}_3$ | < 3.0                  | n.d. <sup>e</sup>                                         | n.d. <sup>e</sup>                                         | n.d. <sup>e</sup>                                         | n.d. <sup>e</sup>      |
| 11  |                | $\text{CK}_1$  | < 3.0                  | n.d. <sup>e</sup>                                         | n.d. <sup>e</sup>                                         | n.d. <sup>e</sup>                                         | n.d. <sup>e</sup>      |
| 12  |                | $\text{CK}_3$  | < 3.0                  | n.d. <sup>e</sup>                                         | n.d. <sup>e</sup>                                         | n.d. <sup>e</sup>                                         | n.d. <sup>e</sup>      |

<sup>a</sup> Polymerization conditions: atmosphere, Ar; initiator, BDM;  $[\text{monomer}]_0/[\text{BDM}]_0/[\text{catalyst}] = 100/1/5$ ; temperature, 100 °C; reaction time, 24 h. <sup>b</sup> Determined by <sup>1</sup>H NMR spectrum of the obtained polymer in  $\text{CDCl}_3$ .

<sup>c</sup> Calculated from  $[\text{monomer}]_0/[\text{BDM}]_0 \times \text{conv.} \times (\text{M.W. of monomer}) + (\text{M.W. of BDM})$ . <sup>d</sup> Determined by SEC in THF using polystyrene standard. <sup>e</sup> Not determined.



In general, once the monomer is nearly fully consumed, side reactions such as intra- and intermolecular transesterification may occur, leading to an increase in dispersity ( $\bar{D}$ ), as observed in run 7 of **Table S2**. However, in run 6 of **Table S2**, a narrow dispersity was obtained even though the L-LA monomer reached nearly complete conversion.

To elucidate the dependence of dispersity ( $\bar{D}$ ) on the progression of polymerization during the ROP of L-LA, kinetic monitoring was conducted under the same polymerization conditions as those used in run 6 of **Table S2**. The polymerization was carried out in a single batch, and aliquots were withdrawn at predetermined time intervals. The resulting crude samples were analyzed by  $^1\text{H}$  NMR and SEC to evaluate monomer conversion,  $M_{n,\text{SEC}}$ , and  $\bar{D}$ . The results are summarized in **Table S3** and **Fig. S6**.

Although the results were not identical to those obtained in run 6 of **Table S2**, the kinetic study showed that the conversion of L-LA reached near completion between 12 and 24 h. With further extension of the reaction time, the dispersity gradually increased. Nevertheless, even after 72 h, the final dispersity ( $\bar{D} = 1.45$ ) remained significantly lower than that observed for the ROP of  $\epsilon$ -CL catalyzed by CA ( $\bar{D} = 1.81$ , run 7 in **Table S2**).

Therefore, the “inconsistency” between the polymerizations catalyzed by CA and  $\text{CK}_3$  can be reasonably attributed to their different activities in promoting transesterification after the monomer conversion reaches a high level.

**Table S3** Kinetic study of the Ring-opening polymerization of L-LA catalyzed by  $\text{CK}_3$  <sup>a</sup>

| time (h) | conv. (%) <sup>b</sup> | $M_{n,\text{SEC}}$ (g mol <sup>-1</sup> ) <sup>c</sup> | $\bar{D}$ <sup>c</sup> |
|----------|------------------------|--------------------------------------------------------|------------------------|
| 5.5      | 60.0                   | 6100                                                   | 1.22                   |
| 12.0     | 88.0                   | 8700                                                   | 1.24                   |
| 24.0     | 99.6                   | 9000                                                   | 1.32                   |
| 48.0     | 99.6                   | 9100                                                   | 1.37                   |
| 72.0     | 99.7                   | 8600                                                   | 1.45                   |

<sup>a</sup> Polymerization conditions: atmosphere, Ar; initiator, BDM;  $[\text{L-LA}]_0/[\text{BDM}]_0/[\text{CK}_3] = 100/1/5$ ; temperature, 100 °C. <sup>b</sup> Determined by  $^1\text{H}$  NMR spectrum of the obtained polymer in  $\text{CDCl}_3$ . <sup>c</sup> Determined by SEC in THF using polystyrene standard.

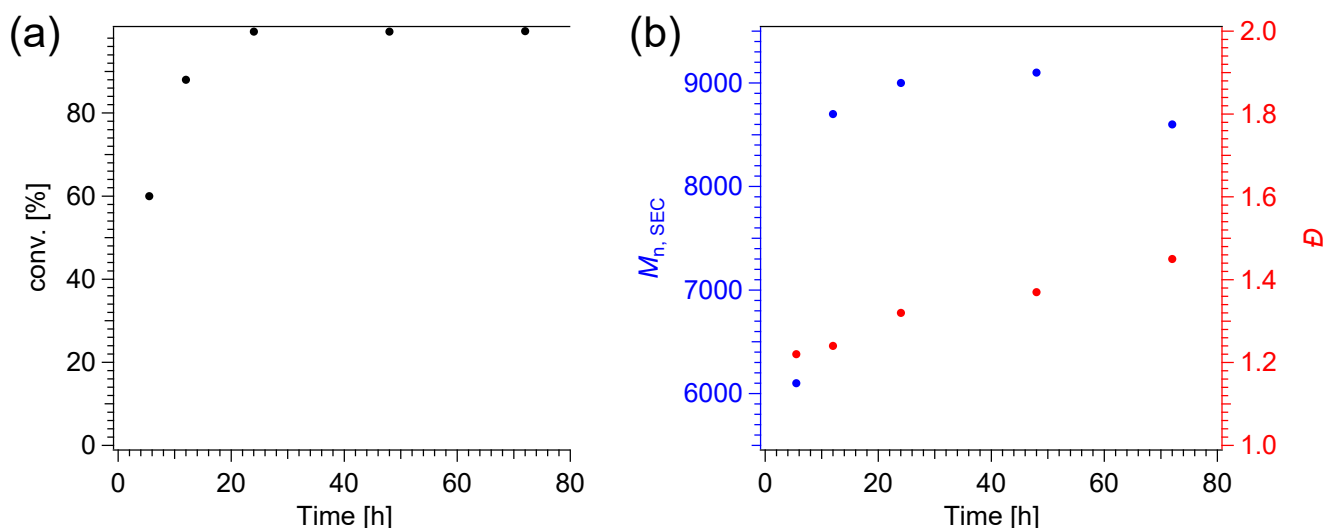

**Fig. S6** (a) Time–conversion plot, (b) Time– $M_{n,\text{SEC}}/\bar{D}$  plot of **Table S3**.

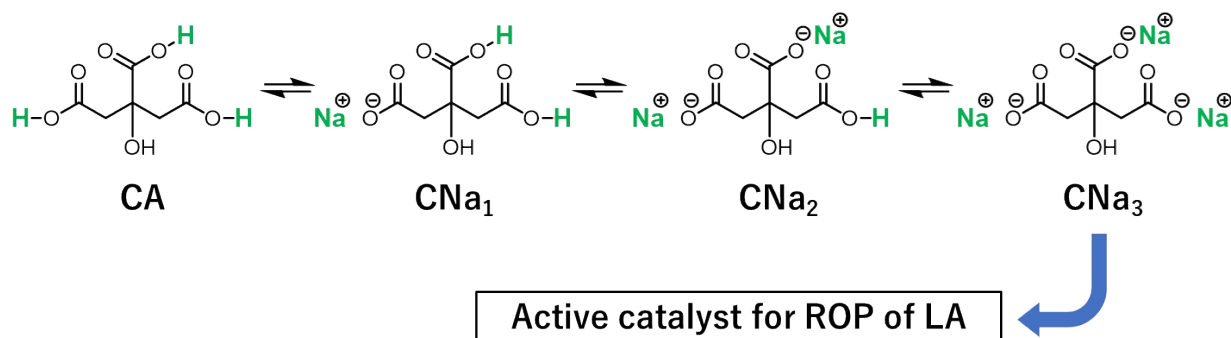

**Scheme S2** Equilibrium and possible active catalyst for ROP of LA when using  $\text{CNa}_1$  and  $\text{CNa}_2$  as the catalysts (runs 1–4 in **Table 3** and **Table S2**).

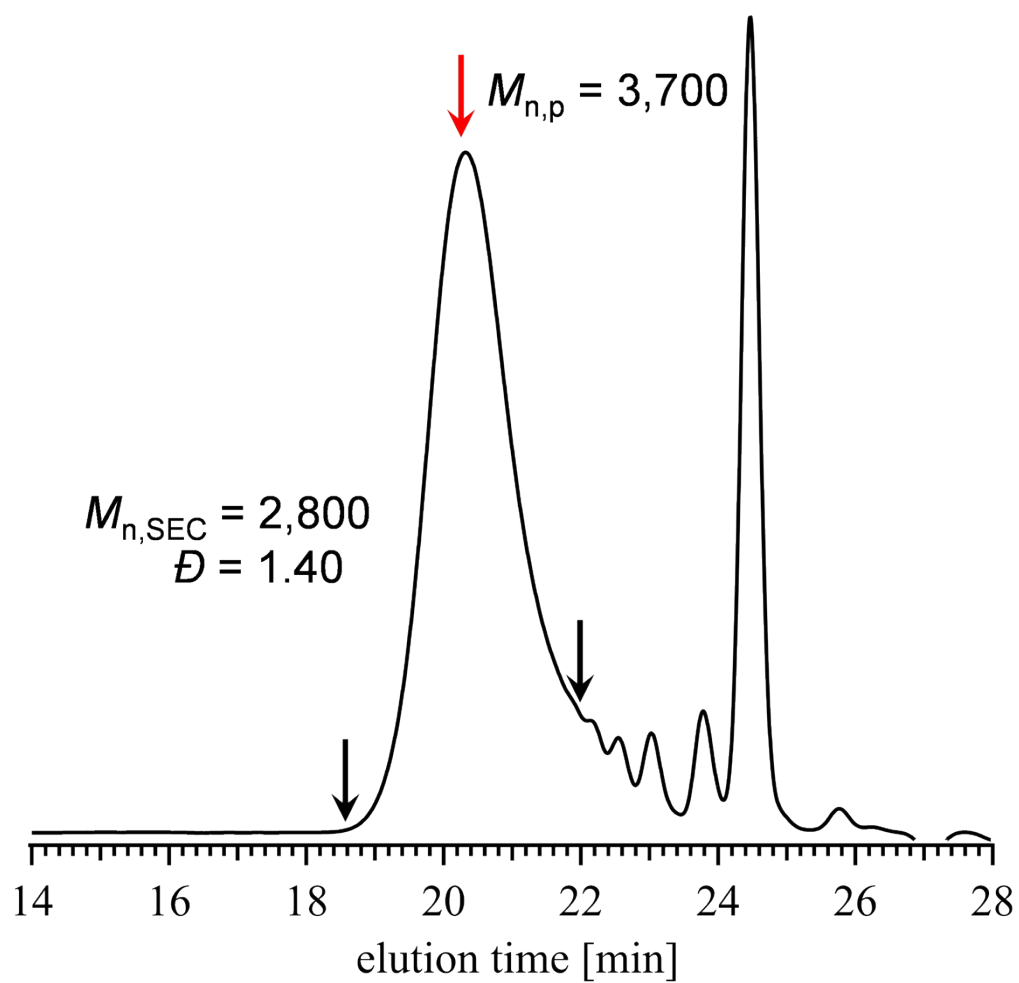

**Fig. S7** SEC traces of the PLLA-*stat*-PCL using CA as a catalyst obtained from run 1 in **Table 3** (eluent, THF; flow rate, 1.0 mL min<sup>-1</sup>).  $M_{n,SEC}$  was determined from the elution range between the two black arrows.

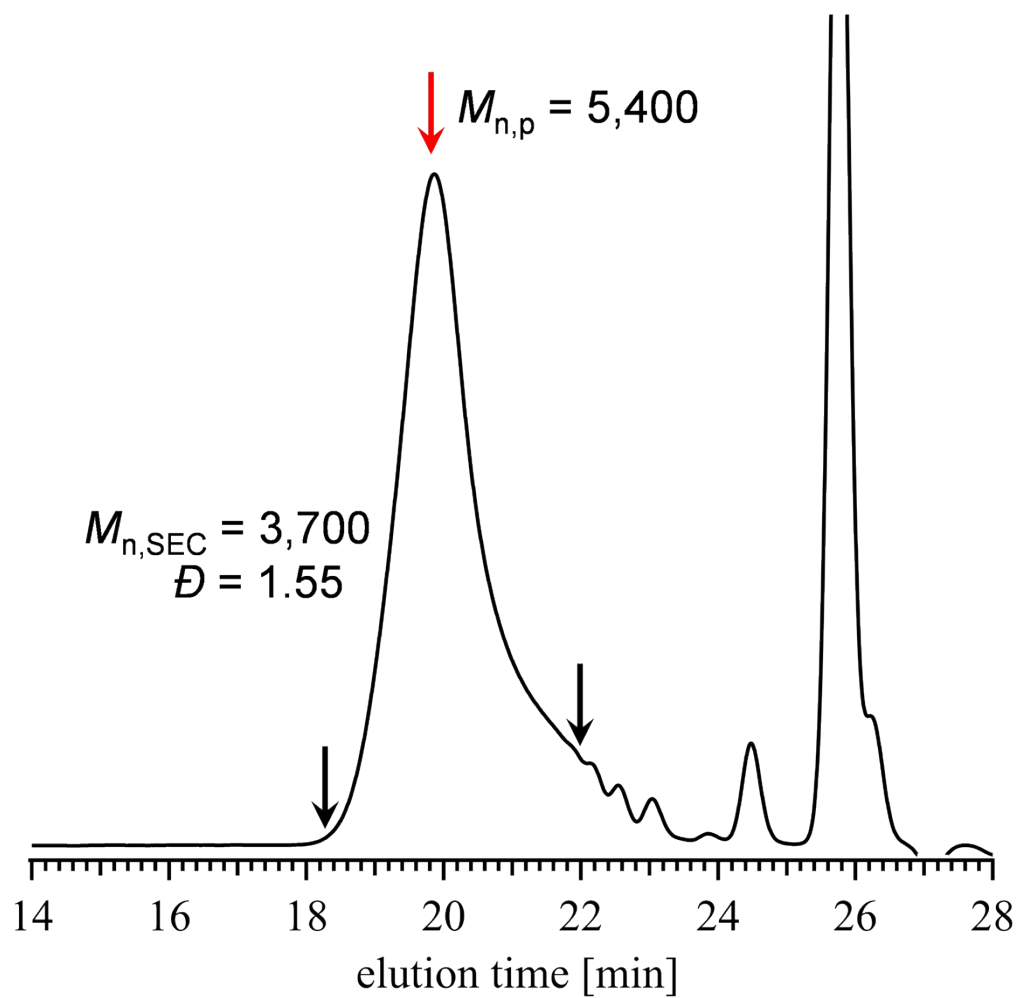

**Fig. S8** SEC traces of the PLLA-*stat*-PCL using  $\text{CNa}_3$  as a catalyst obtained from run 2 in **Table 3** (eluent, THF; flow rate,  $1.0 \text{ mL min}^{-1}$ ).  $M_{n,SEC}$  was determined from the elution range between the two black arrows.

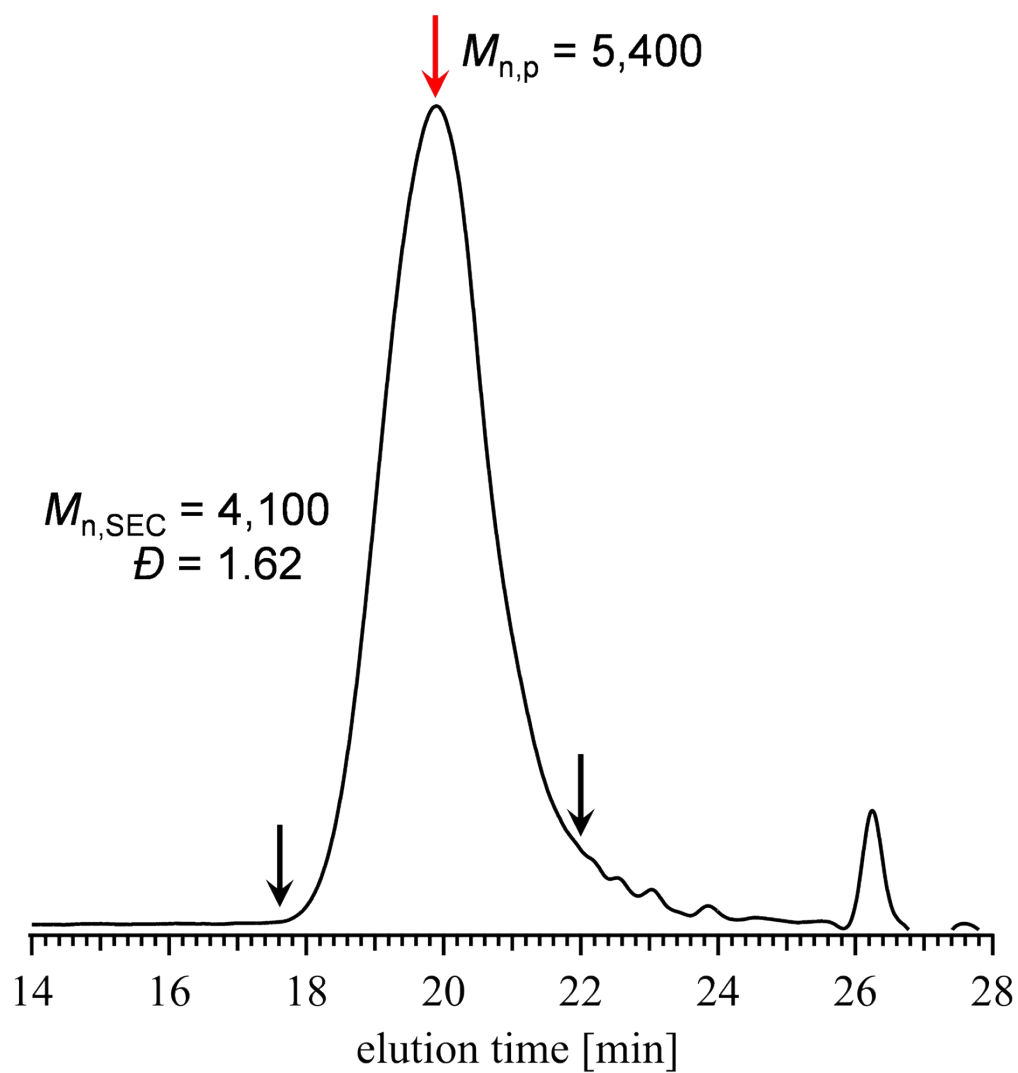

**Fig. S9** SEC traces of the PLLA-*stat*-PCL using  $\text{CNa}_1$  as a catalyst obtained from run 3 in **Table 3** (eluent, THF; flow rate,  $1.0 \text{ mL min}^{-1}$ ).  $M_{n,SEC}$  was determined from the elution range between the two black arrows.

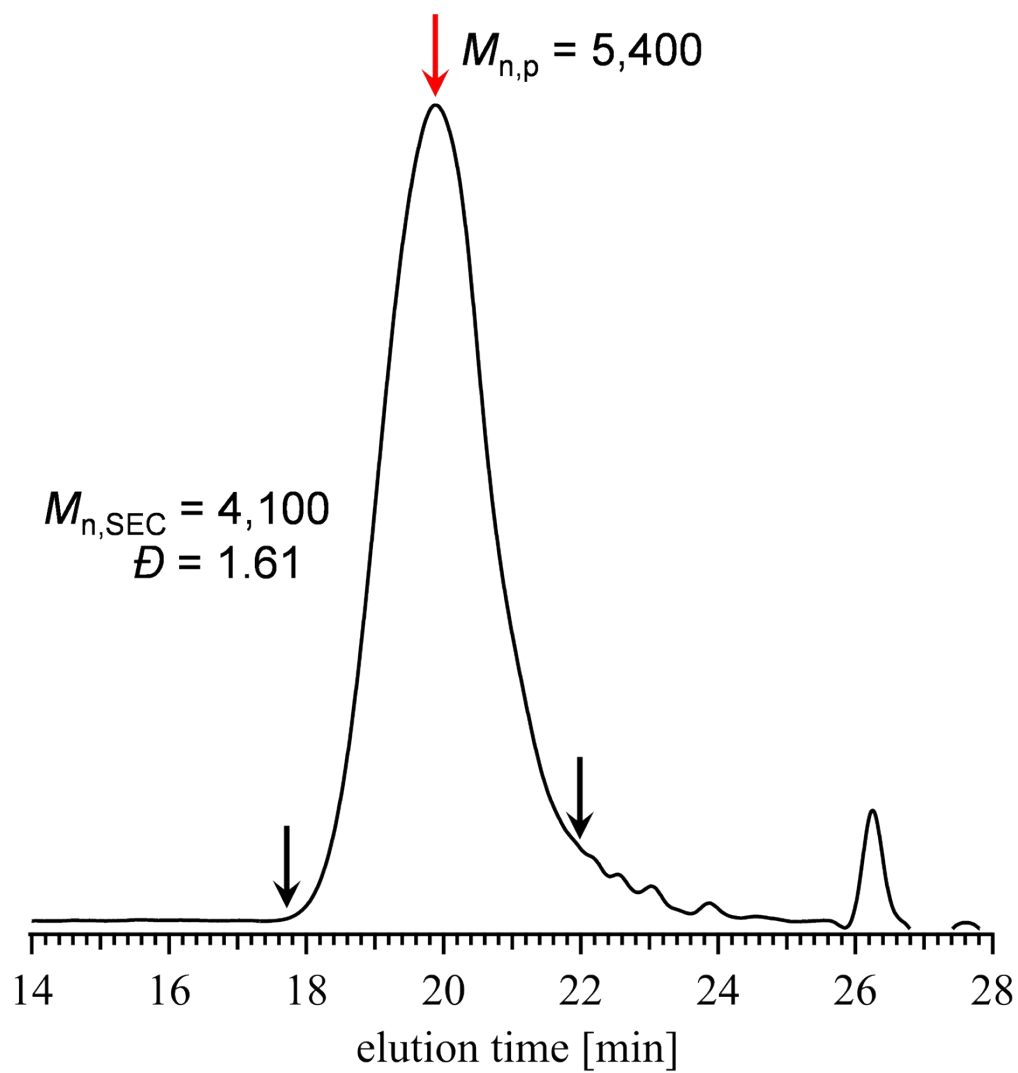

**Fig. S10** SEC traces of the PLLA-*stat*-PCL using  $\text{CNa}_2$  as a catalyst obtained from run 4 in **Table 3** (eluent, THF; flow rate,  $1.0 \text{ mL min}^{-1}$ ).  $M_{n,SEC}$  was determined from the elution range between the two black arrows.

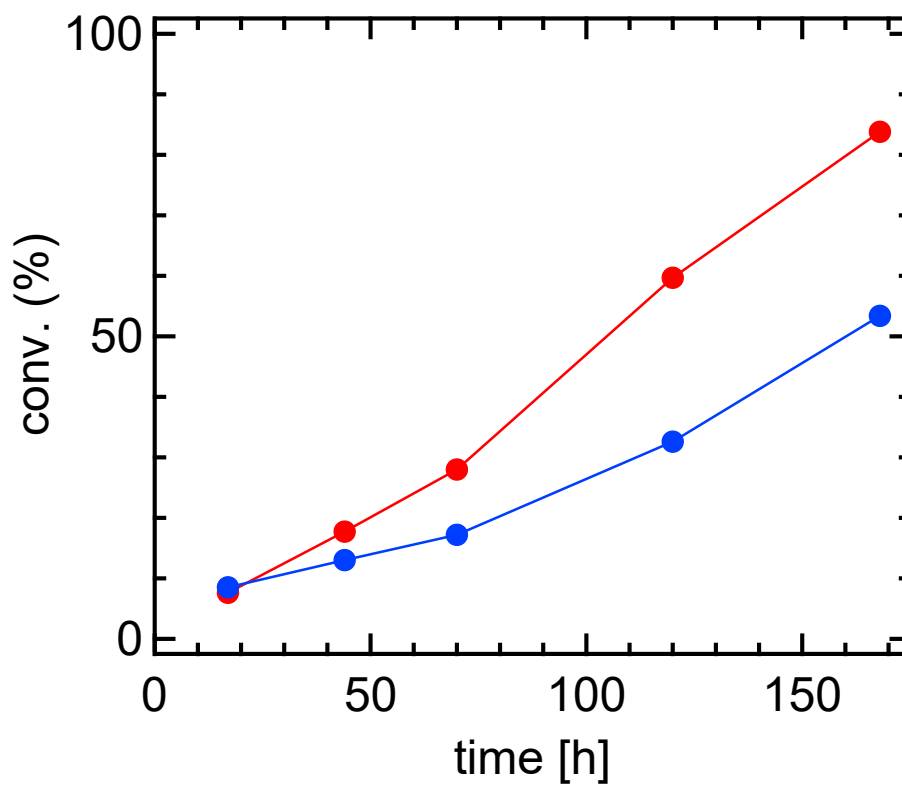

Fig. S11 Plot of monomer conversion vs. time (run 7 in **Table 3**).

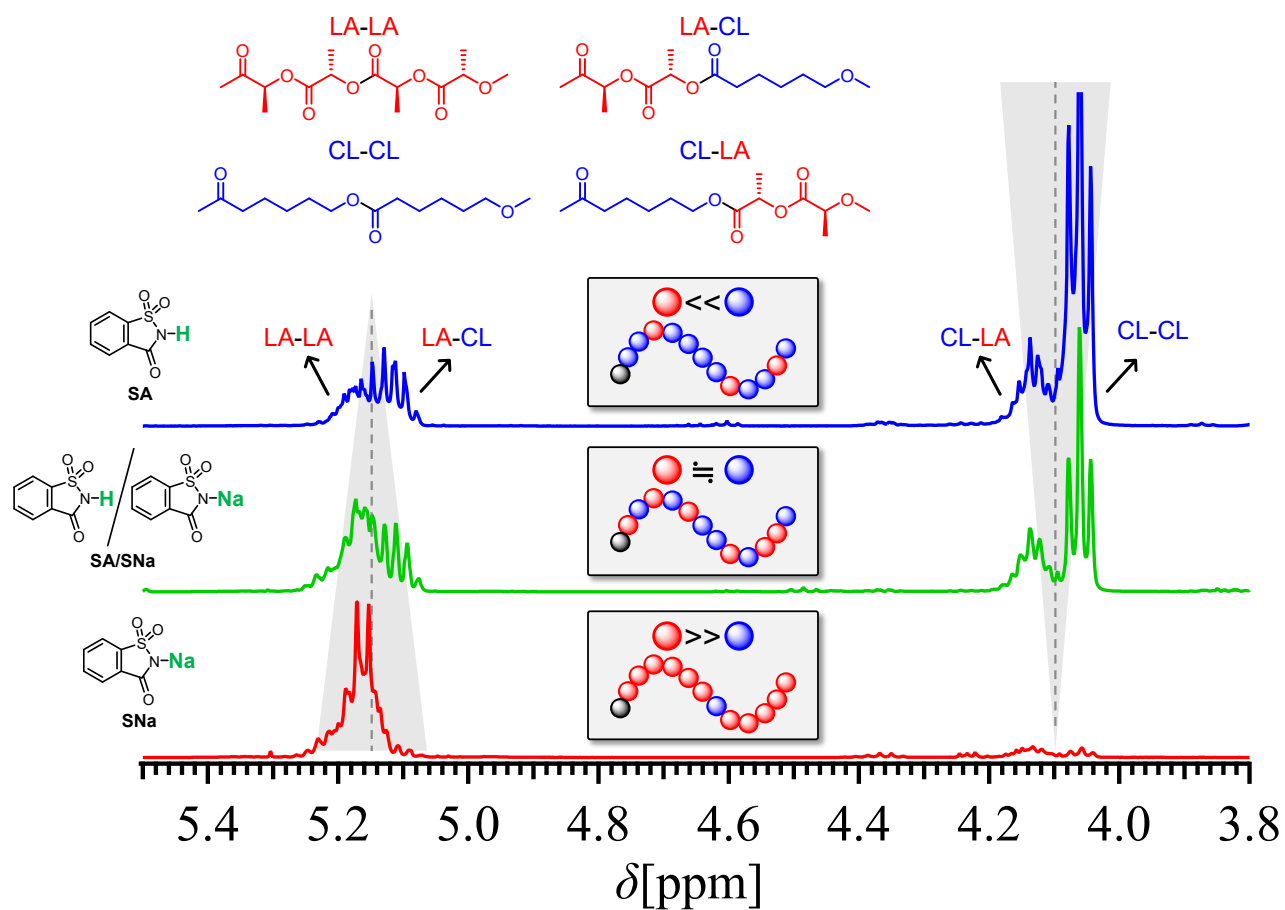

**Fig. S12**  $^1\text{H}$  NMR spectra of the PLLA-*stat*-PCL obtained from runs 5, 6 and 8 in **Table 3** (solvent,  $\text{CDCl}_3$ ; 400 MHz).  
(expanded spectrum ranging from 3.8 ppm to 5.5 ppm.)



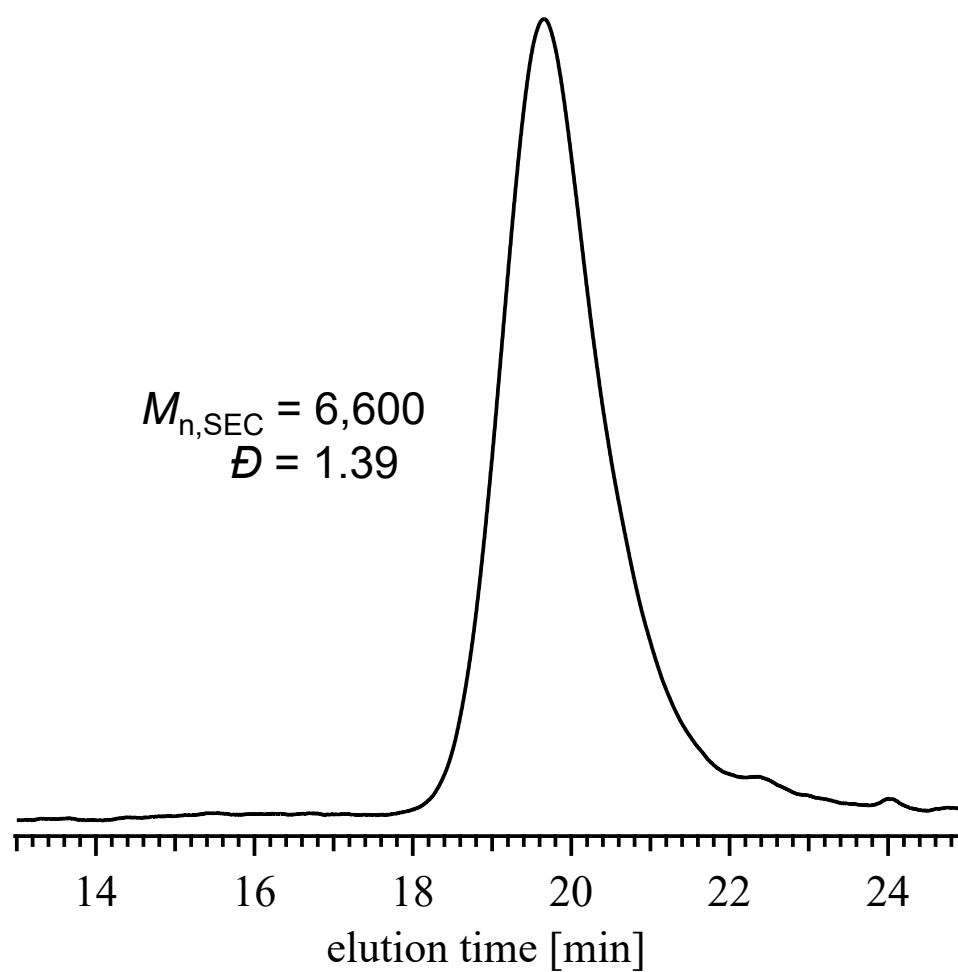

**Fig. S13** SEC trace of the PLLA-*stat*-PCL using SA as a catalyst obtained from run 5 in **Table 3** (eluent, THF; flow rate, 1.0 mL min<sup>-1</sup>)

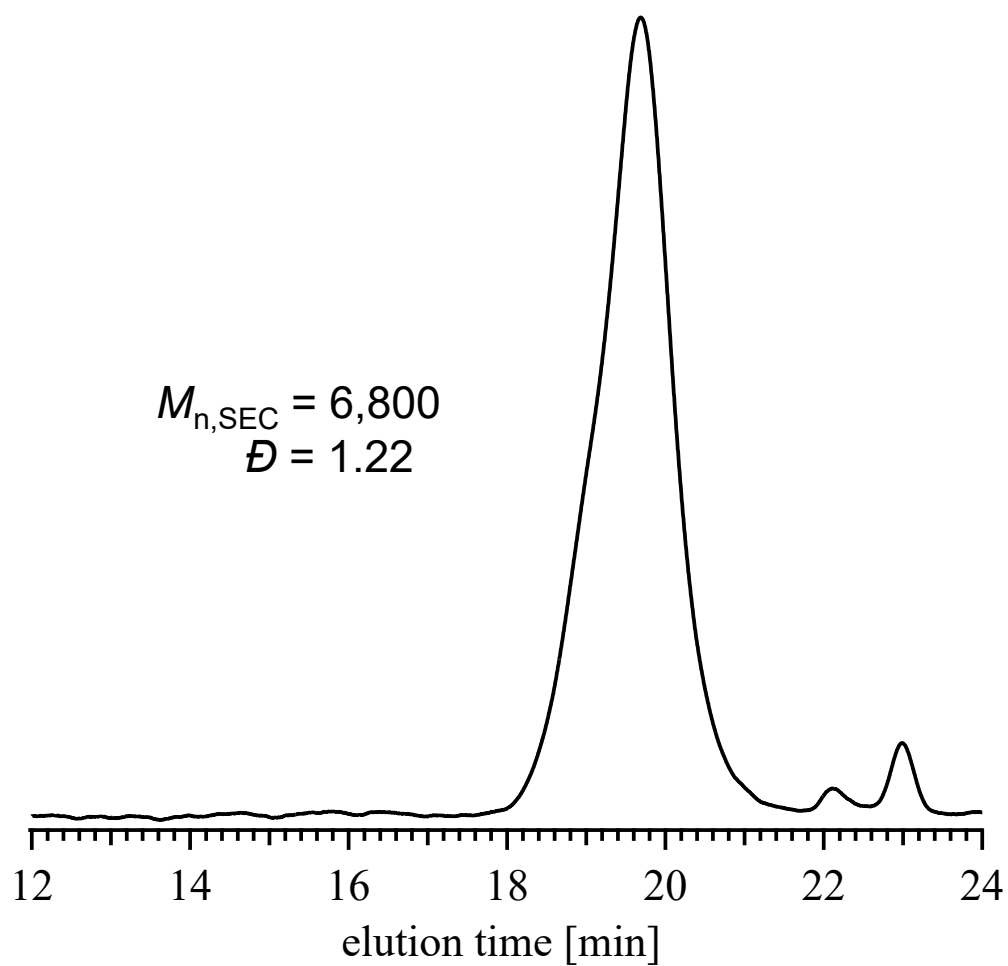

**Fig. S14** SEC trace of the PLLA-*stat*-PCL using SNa as a catalyst obtained from run 6 in **Table 3** (eluent, THF; flow rate, 1.0 mL min<sup>-1</sup>)

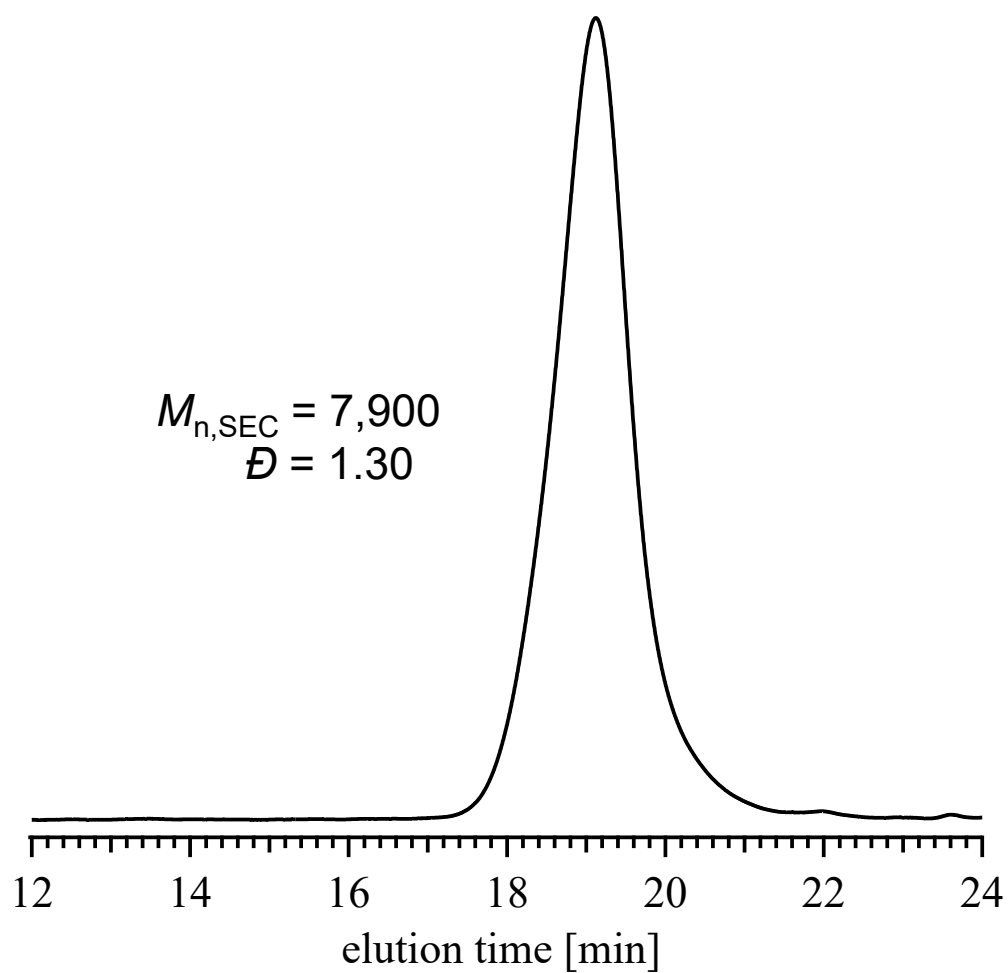

**Fig. S15** SEC trace of the PLLA-*stat*-PCL using SA and SNa as a mixed catalyst (SA:SNa=1:4) obtained from run 7 in **Table 3** (eluent, THF; flow rate, 1.0 mL min<sup>-1</sup>)

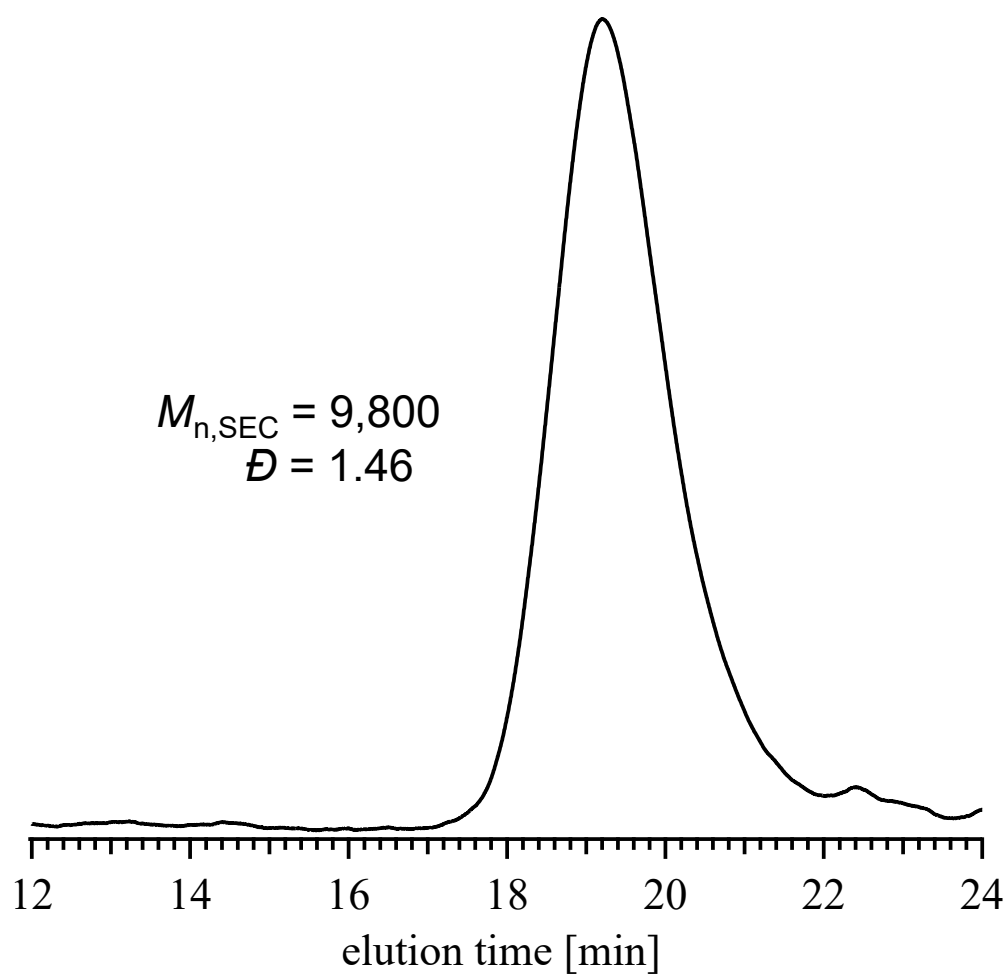

**Fig. S16** SEC trace of the PLLA-*stat*-PCL using SA and SNa as a mixed catalyst (SA:SNa=3:2) obtained from run 8 in **Table 3** (eluent, THF; flow rate, 1.0 mL min<sup>-1</sup>)

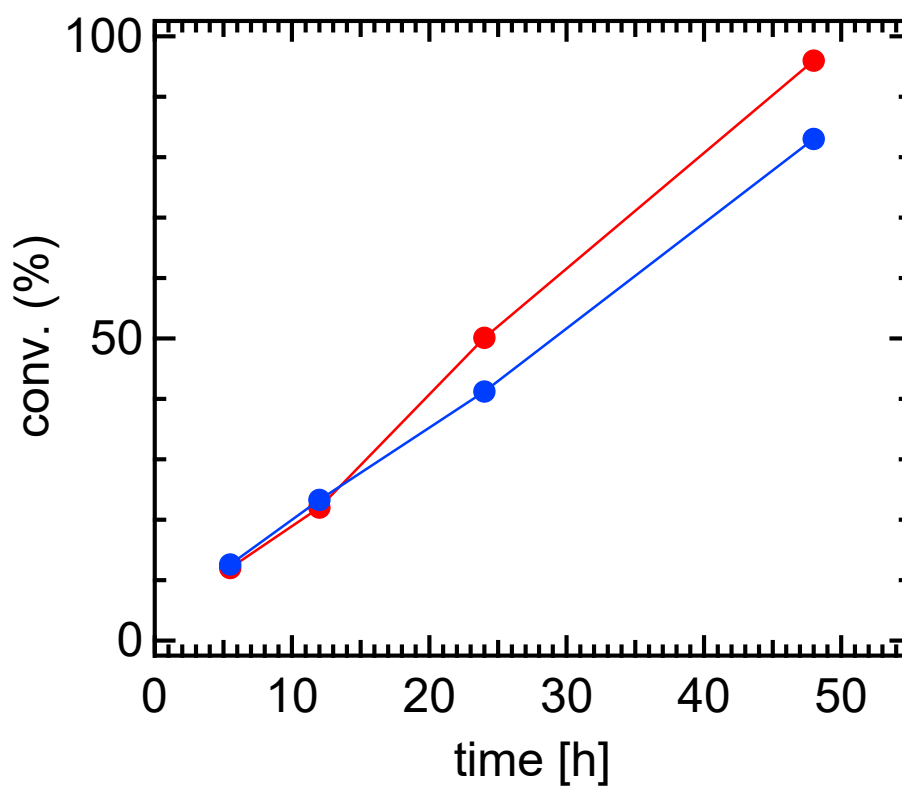

Fig. S17 Plot of monomer conversion vs. time (run 9 in **Table 3**).

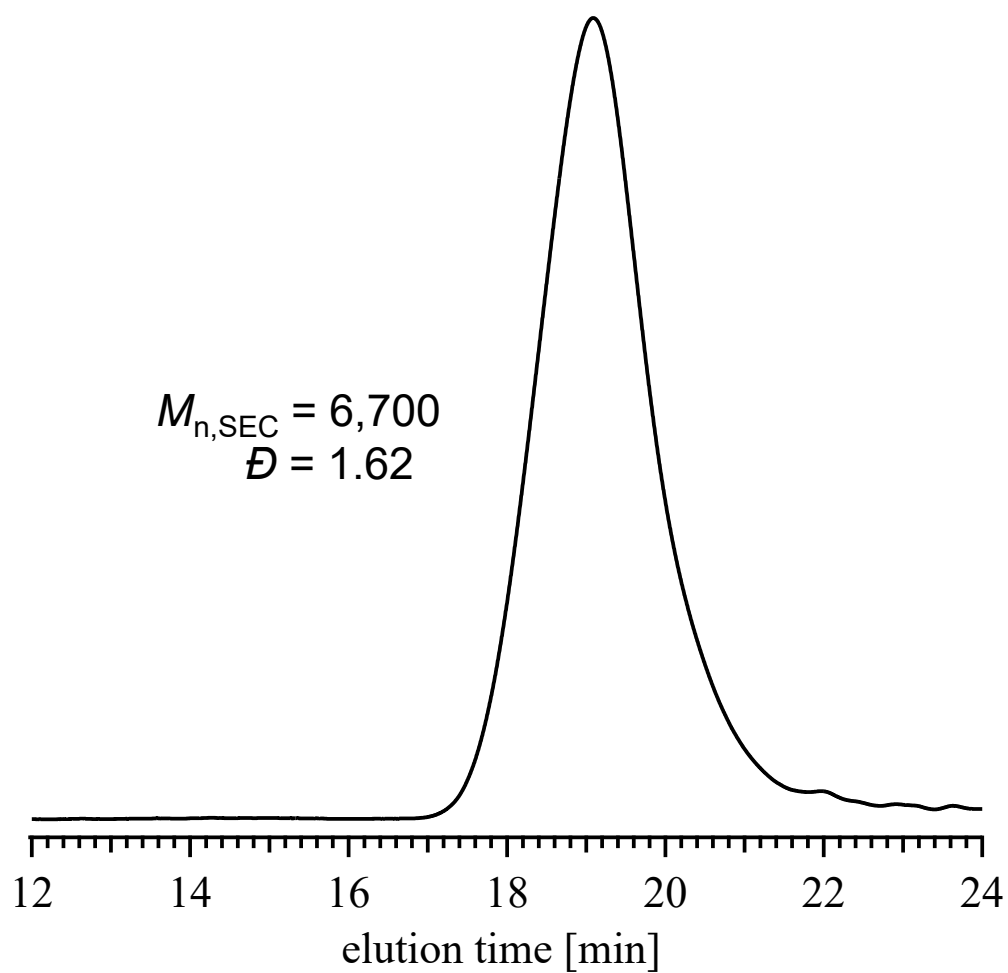

**Fig. S18** SEC trace of the PLLA-*stat*-PCL using SA and SNa as a mixed catalyst (SA:SNa=3:2) obtained from run 9 in **Table 3**. The polymerization was conducted at 160 °C (eluent, THF; flow rate, 1.0 mL min<sup>-1</sup>)

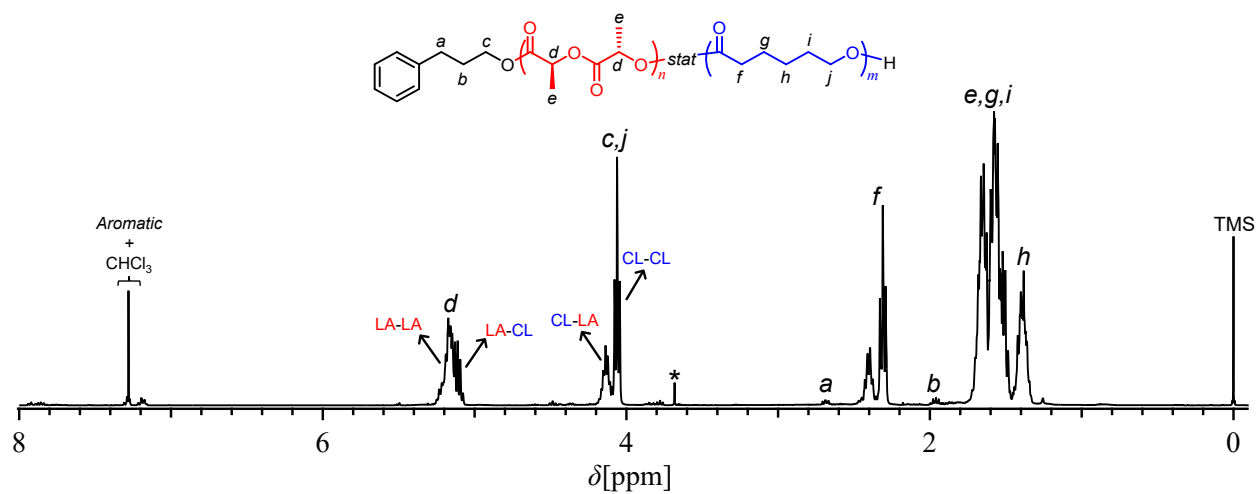

**Fig. S19**  $^1\text{H}$  NMR spectrum of the PLLA-*stat*-PCL using SA and SNa as a mixed catalyst (3:2) obtained from run 8 in **Table 3** (solvent,  $\text{CDCl}_3$ ; 400 MHz).

$$\begin{aligned} L_{L-LA} &= \frac{[LL\bar{L}\bar{L}\bar{L}\bar{L}] + [L\bar{L}\bar{L}\bar{L}\bar{C}] + [C\bar{L}\bar{L}\bar{L}\bar{L}] + [C\bar{L}\bar{L}\bar{C}]}{[C\bar{L}\bar{L}\bar{C}] + \frac{1}{2}([C\bar{L}\bar{L}\bar{L}\bar{L}] + [L\bar{L}\bar{L}\bar{L}\bar{C}])} \\ &= \frac{[L\bar{L}\bar{L}\bar{L}\bar{L}\bar{L}] + [L\bar{L}\bar{L}\bar{L}\bar{C}] + [C\bar{L}\bar{L}\bar{L}\bar{L}] + [C\bar{L}\bar{L}\bar{C}]}{[C\bar{L}\bar{L}\bar{C}] + [C\bar{L}\bar{L}\bar{L}\bar{L}] + [L\bar{L}\bar{L}\bar{L}\bar{C}]} \quad (\because [C\bar{L}\bar{L}\bar{L}\bar{L}] = [C\bar{L}\bar{L}\bar{L}\bar{L}], [L\bar{L}\bar{L}\bar{L}\bar{C}] = [L\bar{L}\bar{L}\bar{L}\bar{C}]) \\ &= \frac{103.75 + 176.75}{103.75} = 2.7 \end{aligned}$$

$$\begin{aligned} L_{\varepsilon - CL} &= \frac{[C\underline{C}\underline{C}] + [C\underline{C}\underline{L}\underline{L}] + [L\underline{L}\underline{C}\underline{C}] + [L\underline{L}\underline{C}\underline{L}]}{[L\underline{L}\underline{C}\underline{L}\underline{L}] + \frac{1}{2}([C\underline{C}\underline{L}\underline{L}] + [L\underline{L}\underline{C}\underline{C}])} \\ &= \frac{[C\underline{C}\underline{C}] + [C\underline{C}\underline{L}\underline{L}] + [L\underline{L}\underline{C}\underline{C}] + [L\underline{L}\underline{C}\underline{L}]}{[L\underline{L}\underline{C}\underline{L}\underline{L}] + [C\underline{C}\underline{L}\underline{L}]} \quad (\because [L\underline{L}\underline{C}\underline{C}] = [C\underline{C}\underline{L}\underline{L}]) \\ &= \frac{53.86 + 100}{53.86} = 2.9 \end{aligned}$$

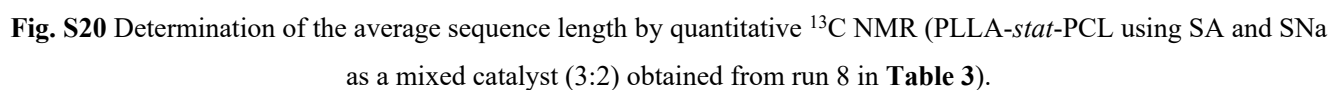



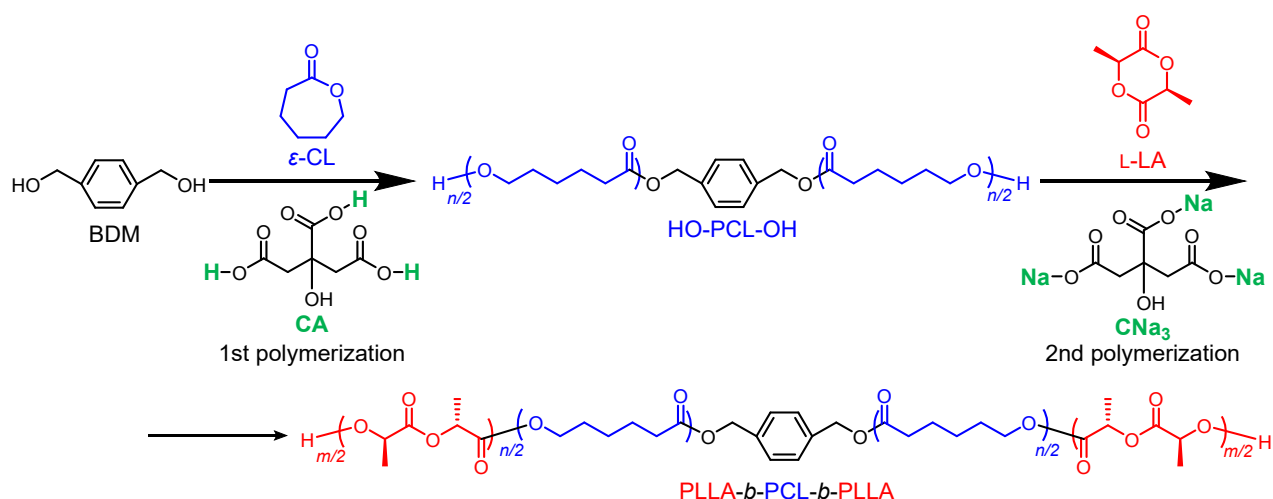

**Table S4** One-pot synthesis of PLLA-*b*-PCL-*b*-PLLA <sup>a</sup>

| Sample | Monomer                  | Cat.                        | [M] <sub>0</sub> /[BDM] <sub>0</sub> /[Cat.] | conv.-CL<br>(%) <sup>b</sup> | conv.-LA<br>(%) <sup>b</sup> | $M_{n,th.}$<br>(g mol <sup>-1</sup> ) <sup>c</sup> | $M_{n,NMR}$<br>(g mol <sup>-1</sup> ) <sup>b</sup> | $M_{n,SEC}$<br>(g mol <sup>-1</sup> ) <sup>d</sup> | $\bar{D}$ <sup>d</sup> |
|--------|--------------------------|-----------------------------|----------------------------------------------|------------------------------|------------------------------|----------------------------------------------------|----------------------------------------------------|----------------------------------------------------|------------------------|
| 1st    | $\epsilon$ -CL           | CA                          | 50/1/1                                       | <b>84.5</b>                  | -                            | 5,260                                              | -                                                  | <b>9,100</b>                                       | 1.09                   |
| 2nd    | $\epsilon$ -CL +<br>L-LA | CA<br>+<br>CNa <sub>3</sub> | (50 + 50)/1/(1 + 5)                          | <b>89.8</b>                  | 74.3                         | 10,600                                             | 7,810                                              | <b>14,000</b>                                      | 1.18                   |

<sup>a</sup> Polymerization conditions: atmosphere, Ar; initiator, BDM; temperature, 100 °C (1st polymerization), 130 °C (2nd polymerization); solvent, toluene. <sup>b</sup> Determined by <sup>1</sup>H NMR spectrum of the obtained polymer in CDCl<sub>3</sub>. <sup>c</sup> Calculated from  $[LA]_0/[BDM]_0 \times \text{conv.}_{LA} \times (\text{M.W. of LA}) + [CL]_0/[BDM]_0 \times \text{conv.}_{CL} \times (\text{M.W. of CL})$ . <sup>d</sup> Determined by SEC in THF using polystyrene standard.

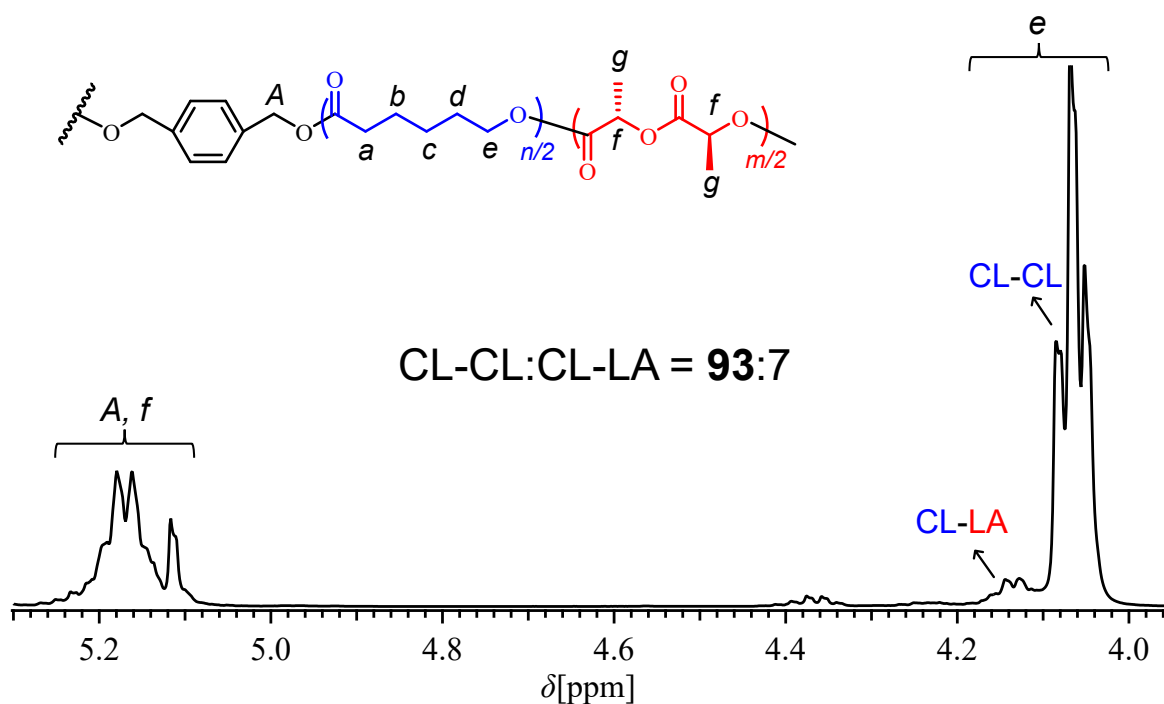

**Fig. S21**  $^1\text{H}$  NMR spectra of the PLLA-*b*-PCL-*b*-PLLA (solvent,  $\text{CDCl}_3$ ; 400 MHz). (expanded spectrum ranging from 3.8 ppm to 5.3 ppm.)
